# Supplementary material for: Visible and NIR light photoactivatableo-hydroxycinnamate system for efficient drug release with fluorescence monitoring
Source: Royal Society of Chemistry journal article supplement (doi:10.1039/d2md00438k), 2023-01-01
Supplement: d2md00438k1.pdf [file d2md00438k1.pdf]

## Supporting Information

### **Visible and NIR-Light Photoactivatable *o*-Hydroxycinnamate System for Efficient Drug Release with Fluorescence Monitoring**

Ajay Gupta,<sup>1</sup> Neelu Singh,<sup>1</sup> Aryan Gautam,<sup>1</sup> Neetesh Dhakar,<sup>2</sup> Sunil Kumar,<sup>2</sup> and Pijus K. Sasmal<sup>1\*</sup>

<sup>1</sup>School of Physical Sciences, Jawaharlal Nehru University, New Delhi 110067, India

<sup>2</sup>Department of Physics, Indian Institute of Technology Delhi, New Delhi 110016, India

\*corresponding author: [pijus@mail.jnu.ac.in](mailto:pijus@mail.jnu.ac.in)

## Table of Contents

### **1. Instruments and Methods**

1.1 Thin layer chromatography and column chromatography

1.2 NMR spectroscopy

1.3 Mass spectrometry

1.4 FT-IR spectroscopy

1.5 UV-visible spectroscopy

1.6 Emission spectroscopy

### **2. Characterization**

2.1 UV-visible spectra

2.2 Emission spectra

2.3 Determination of lipophilicity

## Supplementary Figures

**Figures S1.** Absorption spectra of compound **2** and ***o*HC-GMC**

**Figures S2.** Effect of pH on drug release profile

**Figures S3.** Photocytotoxicity of ***o*HC-GMC** in A549 and MCF7 cells at visible light

**Figures S4.** Cytotoxicity of **GMC** in A549 and MCF7 cells at visible light

**Figures S5.** NIR-triggered drug release from ***o*HC-GMC** by absorption spectroscopy

**Figures S6.** Cytotoxicity of **GMC** in A549 cells at two-photon NIR light

## Supplementary References

## 1. Instruments and Methods

### 1.1 Thin layer chromatography (TLC) and column chromatography

TLC was carried out on aluminium plates coated with silica gel mixed with fluorescent indicator. The purification of synthesized compounds was performed with silica gel (60-120 mesh) column chromatography.

### 1.2 NMR spectroscopy

$^1\text{H}$  and  $^{13}\text{C}$  NMR spectra were acquired on a Bruker 500 MHz spectrometer in  $\text{CDCl}_3$  or  $\text{DMSO-d}_6$  at ambient temperature with tetramethylsilane (TMS) as an internal standard. NMR standards used were as follows: ( $^1\text{H-NMR}$ )  $\text{CDCl}_3 = 7.260$  ppm;  $\text{DMSO-d}_6 = 2.50$  ppm.  $\text{CD}_3\text{OD} = 3.31$  ppm ( $^{13}\text{C-NMR}$ )  $\text{CDCl}_3 = 77.00$  ppm;  $\text{DMSO-d}_6 = 39.520$  ppm. All chemical shifts ( $\delta$ ) are reported in ppm relative to TMS. Spin multiplicities were reported as a singlet (s), doublet (d), triplet (t), quartet (q), doublet of doublets (dd), triplet of doublets (td), doublet of doublet of doublets (ddd), multiplet (m) and broad (br) with coupling constant ( $J$ ) reported in Hz.

### 1.3 Mass spectrometry

Electrospray ionization mass spectra (ESI-MS) were obtained using a Waters make ESI-MS model synapt G2 high-definition mass spectrometry.

### 1.4 FT-IR spectroscopy

Fourier transform-Infrared (FT-IR) spectra were measured using IR Affinity-1S (Shimadzu, Kyoto, Japan) FT-IR spectrophotometer equipped with a single reflection attenuated total reflectance (ATR) accessory. The IR spectra were recorded from 4000 to 450  $\text{cm}^{-1}$  using a resolution of 4  $\text{cm}^{-1}$  with 45 scans. In IR absorption spectra, the shapes and signal intensities (height) of peaks (bands) are denoted by the following abbreviations: br = broad, vs = very strong, s = strong, m = medium and w = weak.

### 1.5 UV-vis spectroscopy

UV-vis absorption spectra were recorded using a SpectraMax M2 plate reader (Molecular Devices) at 298 K from 800 to 200 nm.

### 1.6 Emission spectroscopy

Emission spectra were measured on SpectraMax M2 plate reader (Molecular Devices).

## 2. Characterization

### 2.1 UV-visible spectra

UV-visible absorption spectra were recorded using SpectraMax M2 plate reader (Molecular Devices) at 298 K from 250 to 600 nm. The absorption spectra of compound **2** (10  $\mu\text{M}$ ), and **oHC-GMC** (10  $\mu\text{M}$ ) were measured in 1:9 DMSO and PBS (100 mM, pH 7.3) at room temperature. All UV-visible

spectroscopic measurements were performed in a quartz cuvette with an optical path length of 10 mm. The wavelength was reported in nanometers (nm).

## 2.2 Emission spectra

Emission spectra were recorded using a SpectraMax M2 plate reader (Molecular Devices). Fluorescence emission spectra were recorded in a quartz cuvette with an optical path length of 10 mm. The emission spectra of **oHC-GMC** (50  $\mu$ M) upon photoirradiation was determined in 1:9 DMSO and PBS (100 mM, pH 7.3) at 25  $^{\circ}$ C with an excitation wavelength of 385 nm ( $\lambda_{em} = 475$  nm).

## 2.3 Determination of lipophilicity

The lipophilicity ( $\log P_{O/W}$ ) of **oHC-GMC** was determined by the standard flask-shaking method as reported in the literature.<sup>1,2</sup> Here,  $\log P_{O/W} = \log (C_O/C_W)$  is defined as the logarithmic ratio of the **oHC-GMC** concentration in n-octanol to that in the water phase. Briefly, 0.4 mg of **oHC-GMC** was taken in 3 mL of n-octanol and water (1:1 v/v) and mixed vigorously for 24 h. The mixture was then kept in a stationary state for an additional 24 h to separate both n-octanol and water phases and then centrifuged at 2500 rpm for 10 min and the supernatant was isolated. The concentration of **oHC-GMC** was then determined by UV-vis spectroscopy in both the n-octanol ( $C_O$ ) and water ( $C_W$ ) phases to estimate the  $\log P_{O/W}$  values.

**Table S1** Photophysical and photochemical data of **oHC-GMC**

| Compound       | $\lambda_{abs}^a$ /nm ( $\epsilon/10^3 M^{-1} cm^{-1}$ ) | $\Phi_u^b$ | $\delta_u(GM)^c$ 800 nm | Log $P_{o/w}^d$ |
|----------------|----------------------------------------------------------|------------|-------------------------|-----------------|
| <b>oHC-GMC</b> | 266 (24), 380 (75)                                       | 0.028      | 1.61                    | 2.11            |

<sup>a</sup>Absorption spectra were recorded in 1:9 DMSO/phosphate buffer (100 mM, pH 7.3). <sup>b</sup>Photochemical quantum yield of (*E*) to (*Z*) photoisomerization after one-photon excitation at visible light (400-700 nm, 11 mW). <sup>c</sup>Two-photon uncaging cross section for (*E*) to (*Z*) photoisomerization with two-photon excitation at 800 nm. <sup>d</sup>Lipophilicity was determined by measuring the partition coefficient of the compound in n-octanol/water.

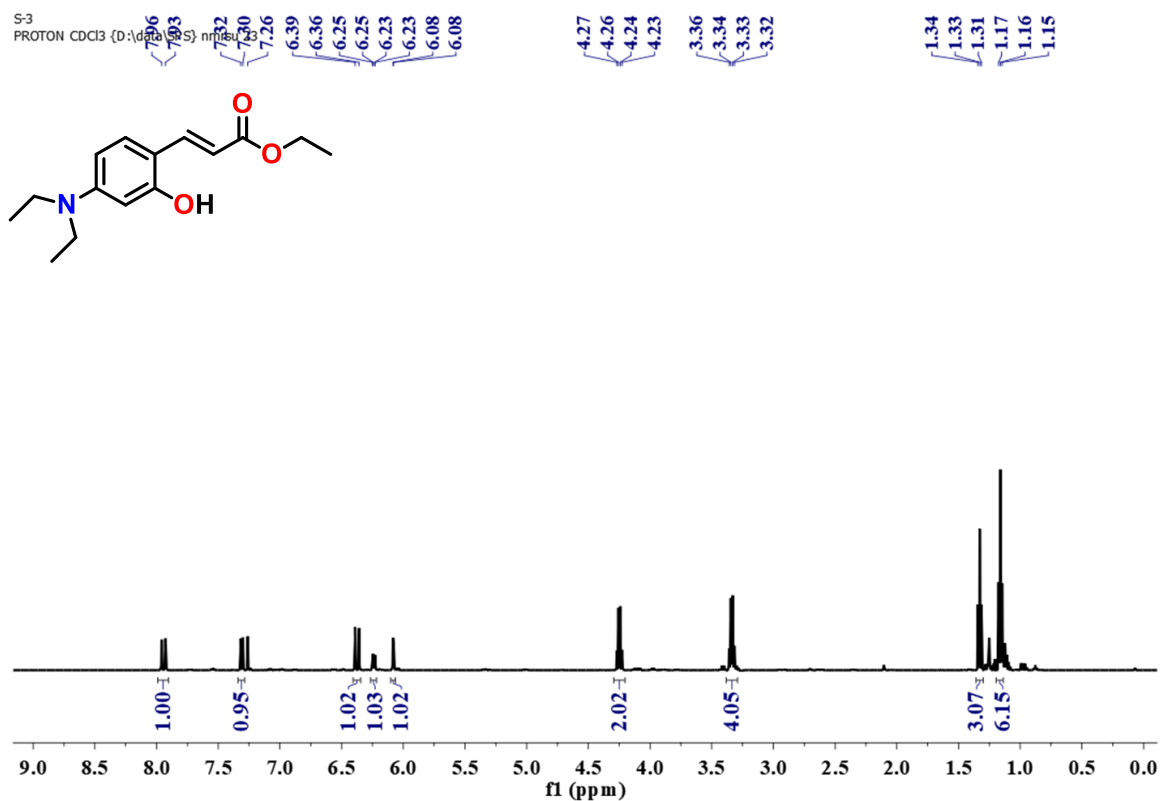

<sup>1</sup>H-NMR spectrum of compound **1** in CDCl<sub>3</sub> at 298K.

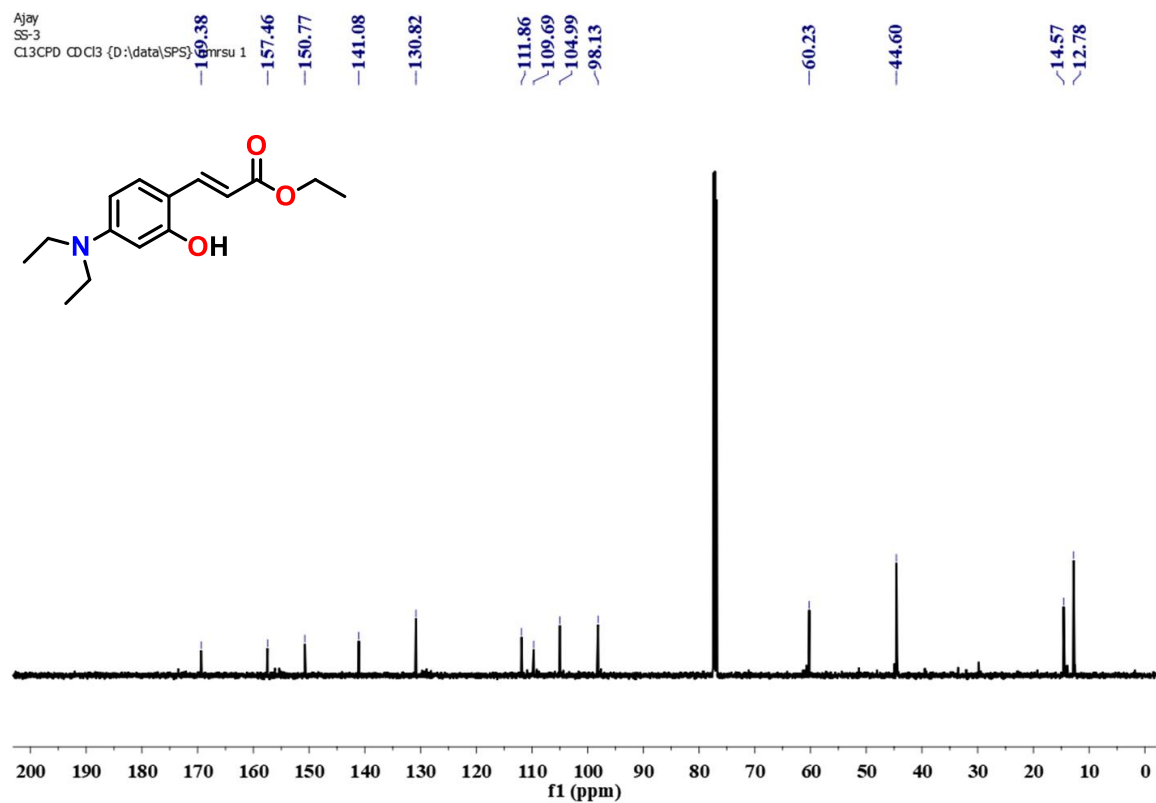

<sup>13</sup>C-NMR spectrum of compound **1** in CDCl<sub>3</sub> at 298K.

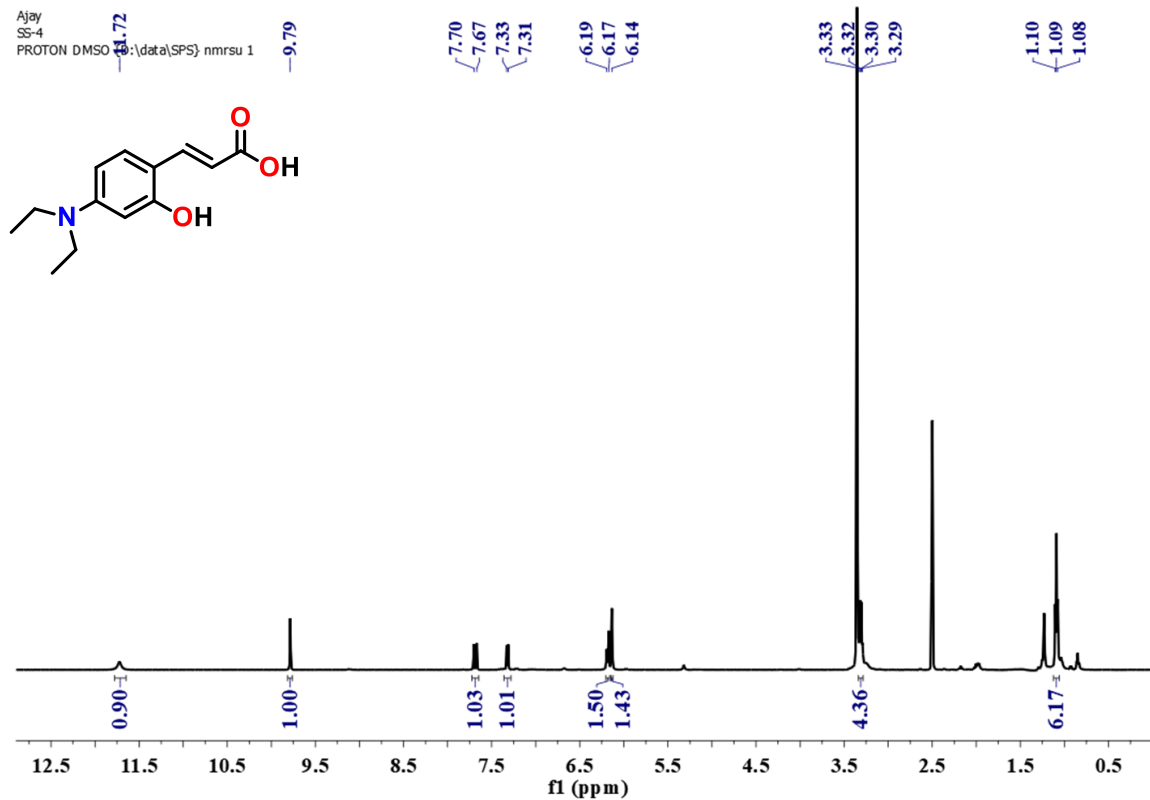

$^1\text{H-NMR}$  spectrum of compound **2** in  $\text{DMSO-d}_6$  at 298K.

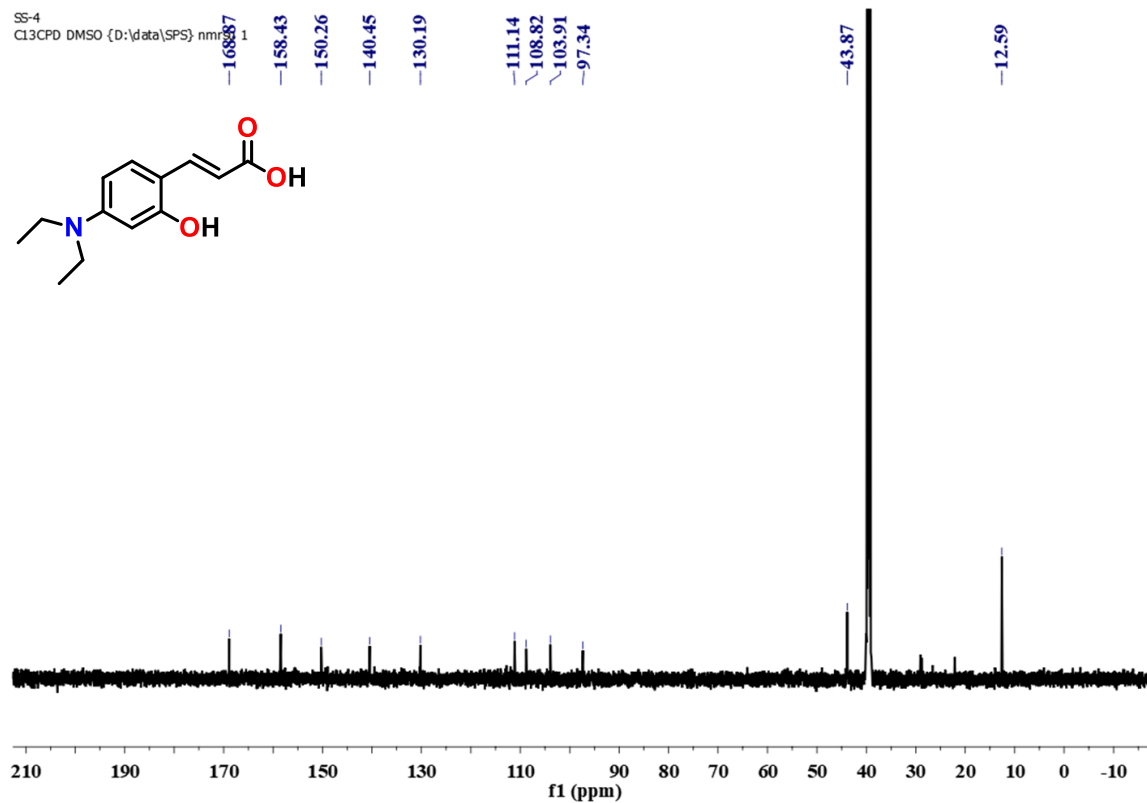

$^{13}\text{C-NMR}$  spectrum of compound **2** in  $\text{DMSO-d}_6$  at 298K.

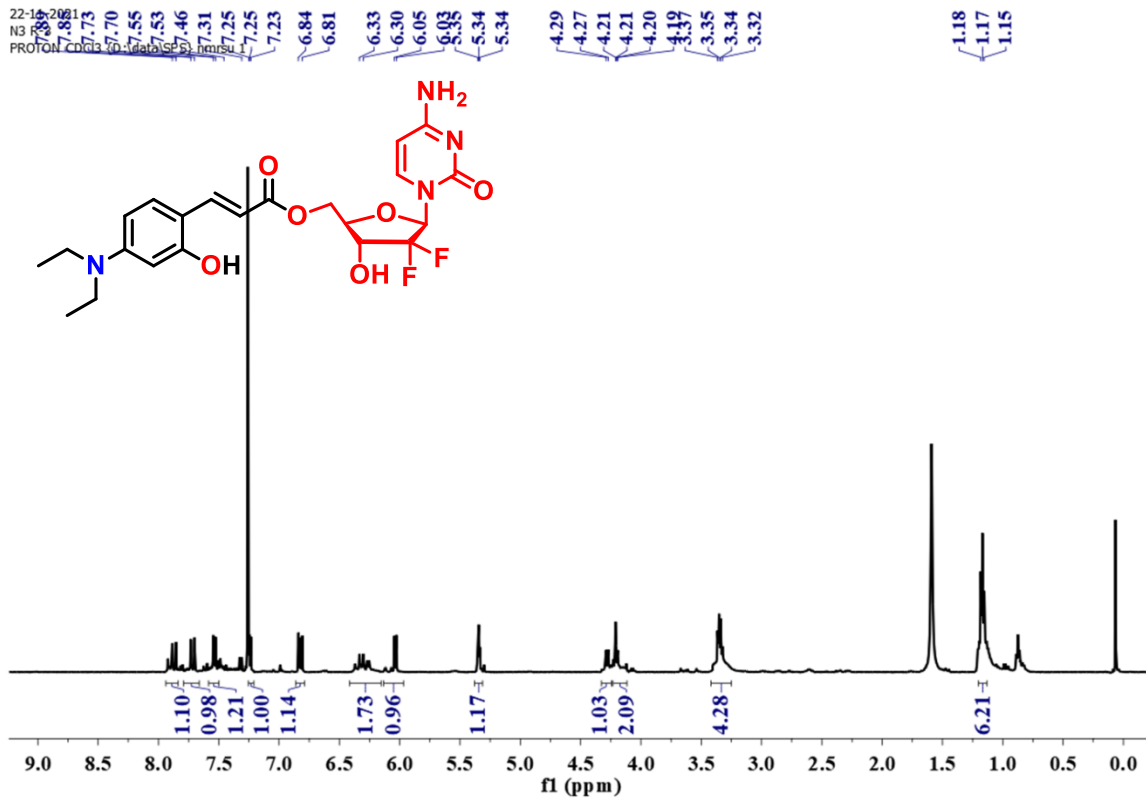

$^1\text{H-NMR}$  spectrum of *o*HC-GMC in  $\text{CDCl}_3$  at 298K.

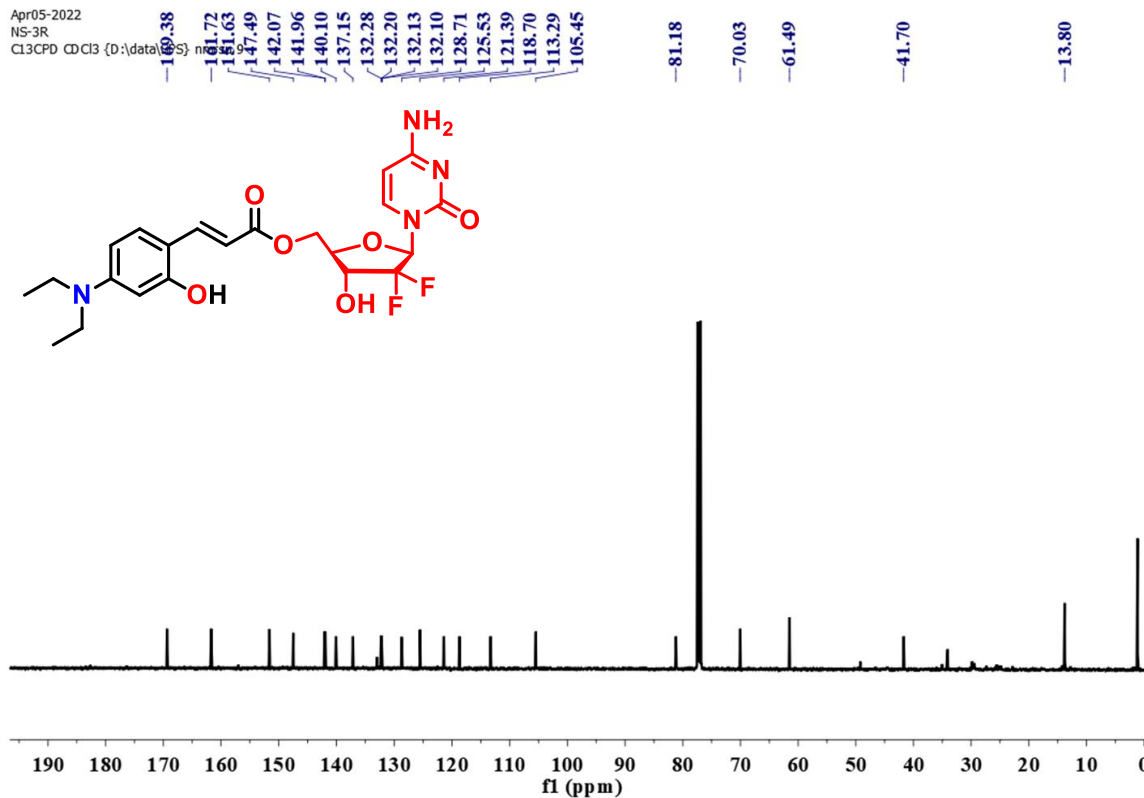

$^{13}\text{C-NMR}$  spectrum of *o*HC-GMC in  $\text{CDCl}_3$  at 298K.

| Sample Name   | JNU     | Position    | P1-A6       | Instrument Name | Instrument 1 | User Name              |                     |
|---------------|---------|-------------|-------------|-----------------|--------------|------------------------|---------------------|
| Inj Vol       | 0.5     | InjPosition |             | SampleType      | Sample       | IRM Calibration Status | Success             |
| Data Filename | NS-1R.d | ACQ Method  | UNION POS.m | Comment         |              | Acquired Time          | 10-11-2022 10:46:32 |

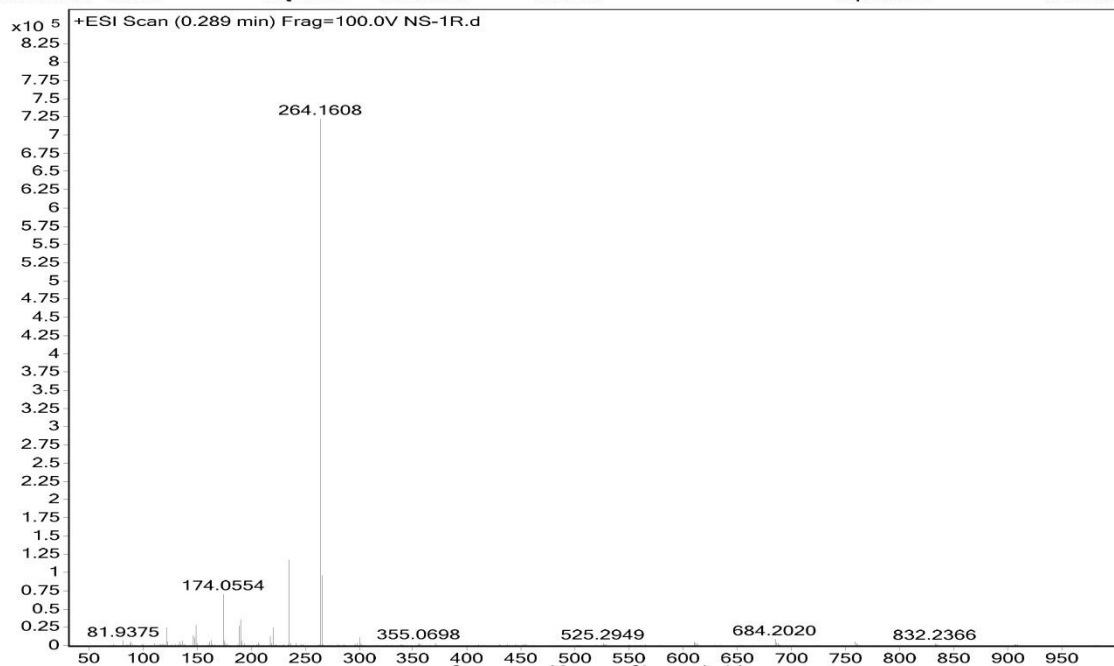

ESI-HRMS spectrum of **1** in DCM/MeOH showing the peak at 264.1608 ( $m/z$ ) assignable to  $[M+H]^+$  at 298K.

| Sample Name   | JNU     | Position    | P1-A7       | Instrument Name | Instrument 1 | User Name              |                     |
|---------------|---------|-------------|-------------|-----------------|--------------|------------------------|---------------------|
| Inj Vol       | 0.5     | InjPosition |             | SampleType      | Sample       | IRM Calibration Status | Success             |
| Data Filename | NS-2R.d | ACQ Method  | UNION POS.m | Comment         |              | Acquired Time          | 10-11-2022 10:48:30 |

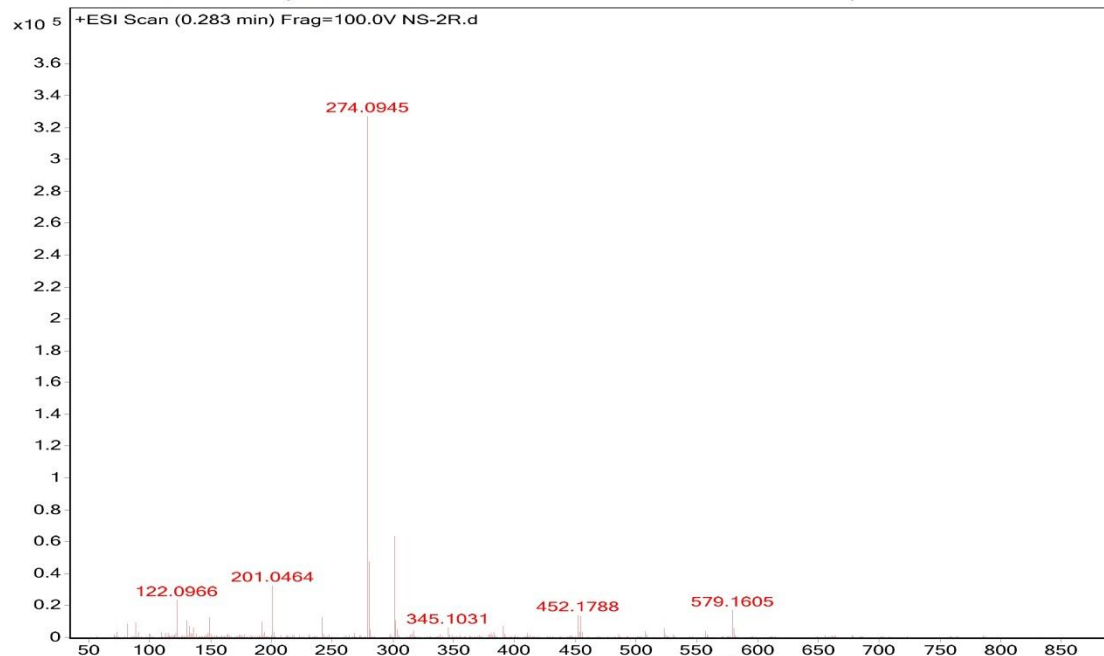

ESI-HRMS spectrum of **2** in DCM/MeOH showing the peak at 274.0945 ( $m/z$ ) assignable to  $[M+K]^+$  at 298K.

| Sample Name   | JNU       | Position    | P1-B1       | Instrument Name | Instrument 1 | User Name              |                     |
|---------------|-----------|-------------|-------------|-----------------|--------------|------------------------|---------------------|
| Inj Vol       | 2         | InjPosition |             | SampleType      | Sample       | IRM Calibration Status | Success             |
| Data Filename | NS-3R-2.d | ACQ Method  | UNION POS.m | Comment         |              | Acquired Time          | 20-12-2021 14:04:54 |

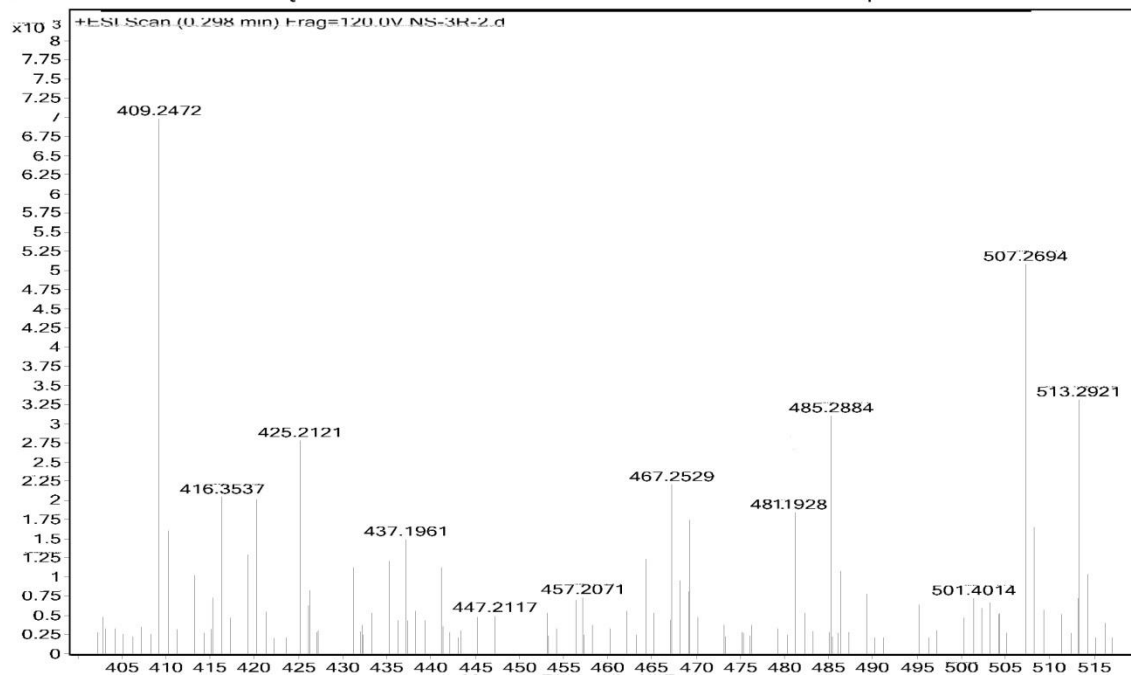

ESI-HRMS spectrum of *o*HC-GMC in DCM/MeOH showing the peak at 481.1928 ( $m/z$ ) assignable to  $[M+H]^+$  at 298K.

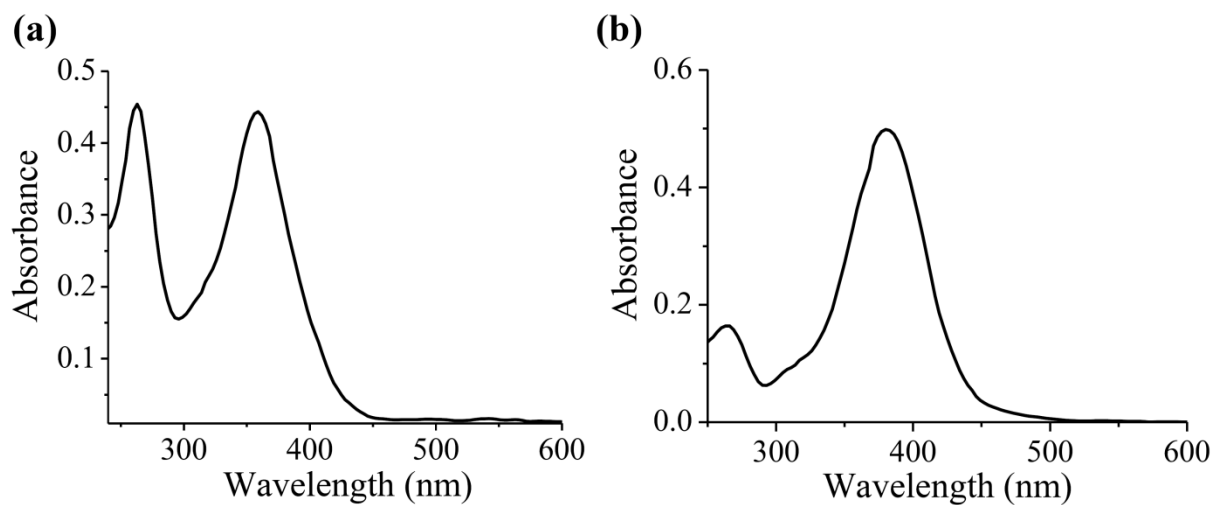

**Fig. S1** Absorption spectra of (a) compound **2** (10  $\mu$ M) and (b) *o*HC-GMC (10  $\mu$ M) in 1:9 DMSO and phosphate buffer (100 mM, pH 7.3) at 25  $^{\circ}$ C.



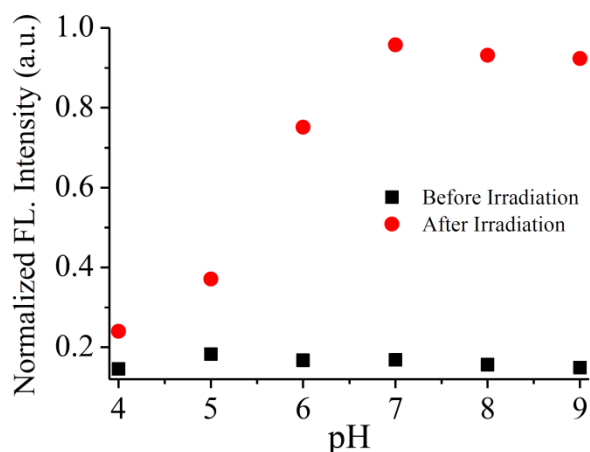

**Fig. S2** Effect of pH for the drug release of *o*HC-GMC (50  $\mu$ M) in 1:9 DMSO/PBS (100 mM) before (■) and after (●) photoirradiation for 10 min with visible light (400-700 nm, 11 mW). The emission intensity of formed coumarin reporter was determined at 475 nm upon excitation at 385 nm.

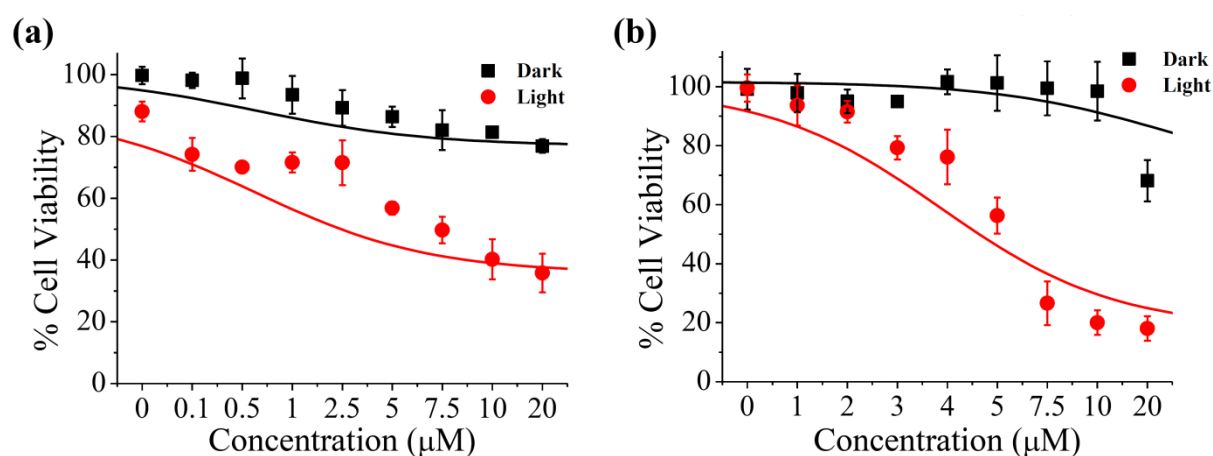

**Fig. S3** Cell viability as determined by MTT assay in (a) A549 cells and (b) MCF7 cells treated with different concentrations of *o*HC-GMC prodrug in the absence (■) or presence (●) of visible light (400-700 nm, 11 mW) for 30 min irradiation.

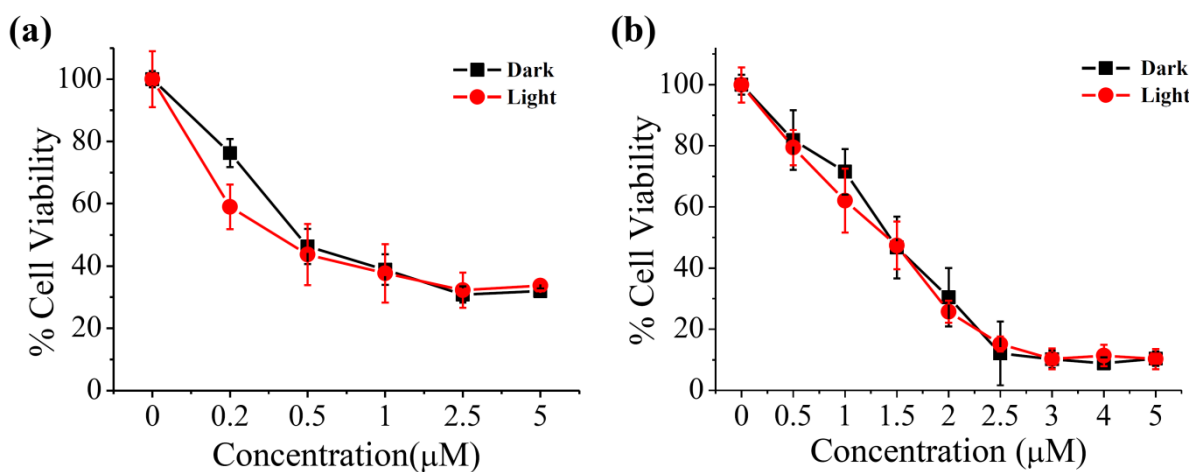

**Fig. S4** Cell viability as determined by MTT assay in (a) A549 cells and (b) MCF7 cells treated with different concentrations of GMC in the absence (■) or presence (●) of visible light (400-700 nm, 11 mW) for 30 min irradiation.

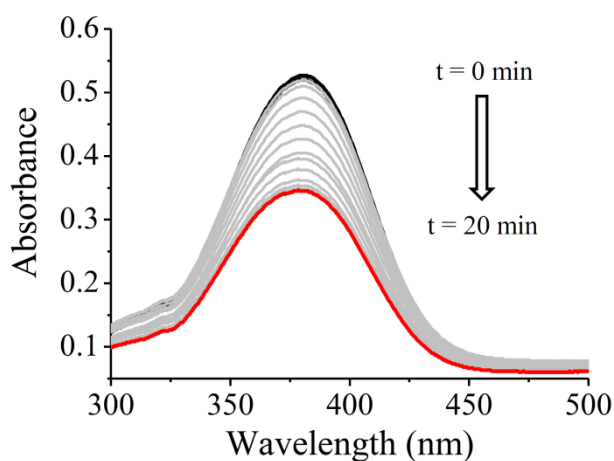

**Fig. S5** Absorption spectra of **oHC-GMC** (10  $\mu\text{M}$ ) in 1:9 DMSO/PBS (100 mM, pH 7.3) upon irradiation with two-photon NIR femtosecond laser light (800 nm, 50 mW) at 25  $^{\circ}\text{C}$ . The sample solution was exposed to NIR light each time before measuring the absorption spectra. The absorption spectra of **oHC-GMC**, before (black line) and after 20 min irradiation (red line), are highlighted.

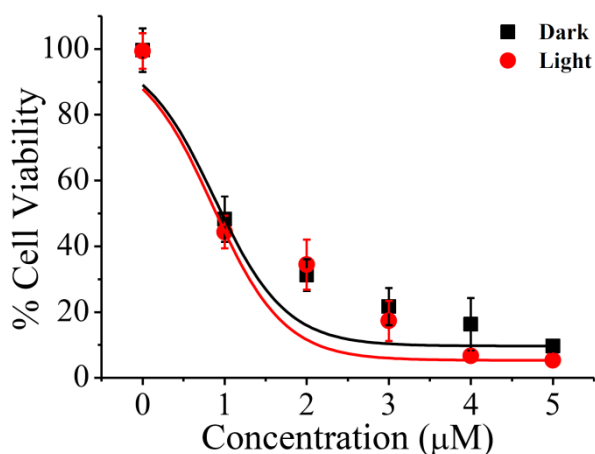

**Fig. S6** Cell viability as determined by MTT assay in A549 cells treated with different concentrations of **GMC** in the absence (■) or presence (●) of two photon NIR light (800 nm, 50 mW) for 10 min irradiation.

## References

1. N. Singh, A. Gupta, P. Prasad, R. K. Sah, A. Singh, S. Kumar, S. Singh, S. Gupta and P. K. Sasmal, *J. Med. Chem.*, 2021, **64**, 17813–17823.
2. A. Gupta, P. Prasad, S. Gupta and P. K. Sasmal, *ACS Appl. Mater. Interfaces*, 2020, **12**, 35967–35976.
